# Supplementary material for: The Immunopathology of Pulmonary Rejection after Murine Lung Transplantation
Source: MDPI journal article supplement (doi:10.3390/cells13030241), 2024-01-27
Supplement: s1 [file s1]

## Supplementary Figures

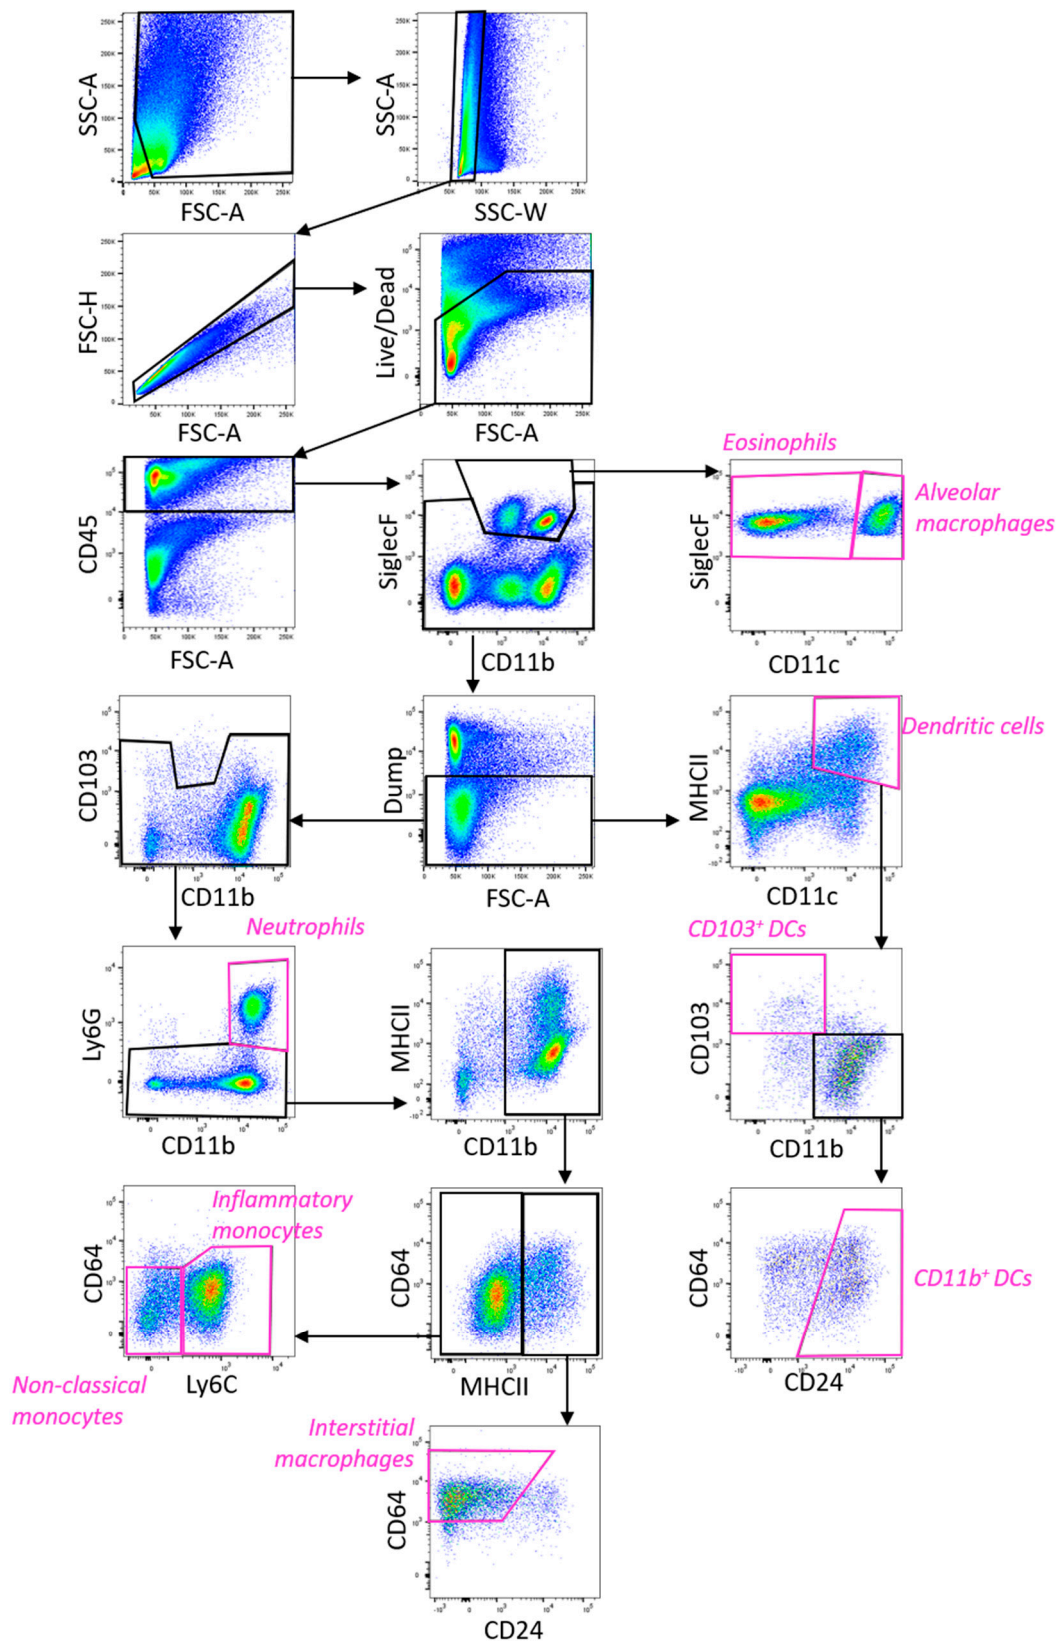

**Figure S1: Gating strategy for myeloid panel for pulmonary leukocytes.** Lung cells were isolated and stained for flow cytometry. After exclusion of red blood cells, debris and doublets of cells, all live cells (Live/dead) were gated. The leukocytes were identified by CD45 staining. Dump gate includes CD3, CD19, NK1.1.

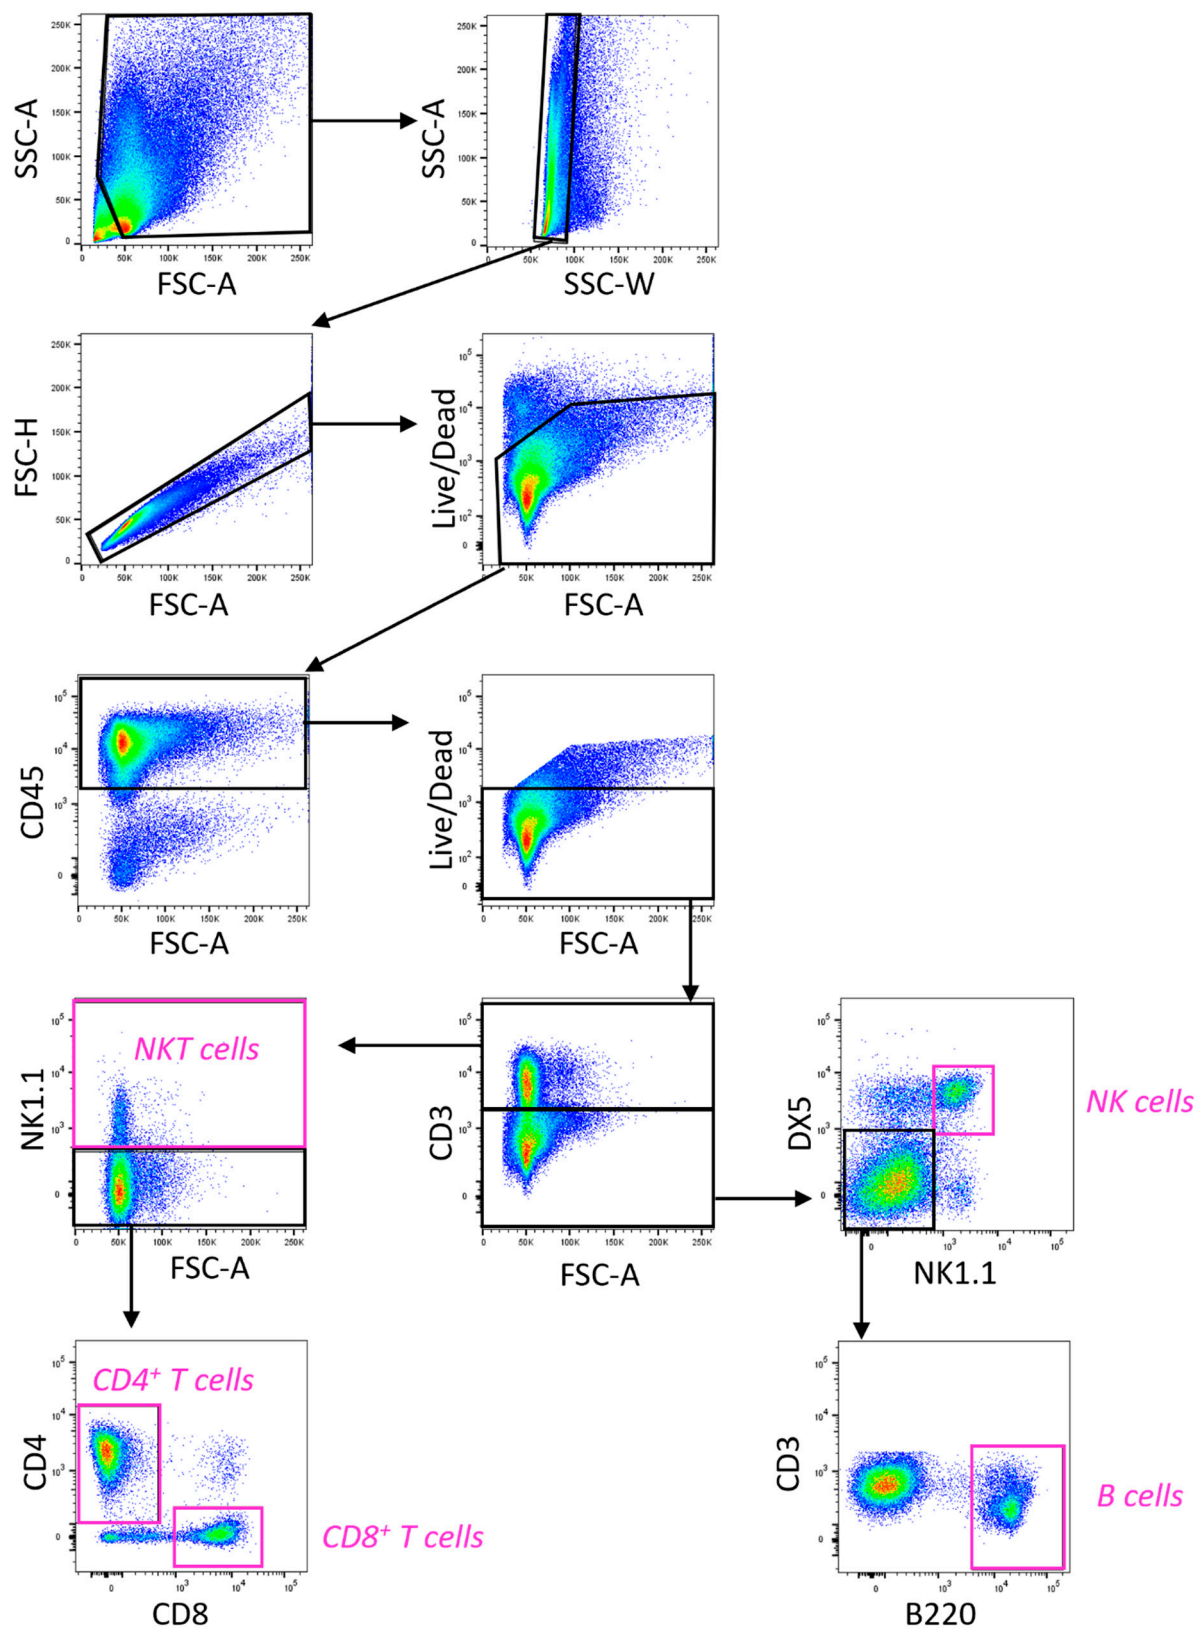

**Figure S2: Gating strategy for lymphoid panel for pulmonary leukocytes.** Lung cells were isolated and stained for flow cytometry. After exclusion of red blood cells, debris and doublets of cells, all live cells (Live/Dead) were gated.

The leukocytes were identified by CD45 staining. The alveolar macrophages were excluded by plotting Live/Dead versus FSC-A as these cells are autofluorescent and result in false positive staining for lymphoid cell markers.

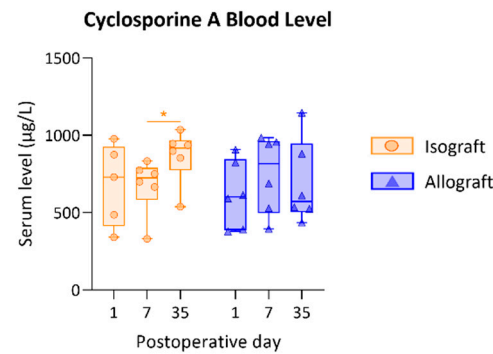

**Figure S3: Cyclosporine A values after murine lung transplantation.** Orthotopic left lung transplantation was performed to create isografts (C57BL/6 → C57BL/6) and allografts (BALB/c → C57BL/6). Cyclosporine A blood trough levels were measured by sequential enzyme immunoassay in 100 µL whole blood. Data are shown as box-and-whisker plots (box: median with interquartile range, whiskers: full data distribution), with each data point representing an individual mouse sample.

Table S1: Markers with associated clone and fluorochrome for the panels used for flow cytometry.

| Panel          | Marker    | Clone       | Fluorochrome     | Laser  |
|----------------|-----------|-------------|------------------|--------|
| Myeloid cells  | CD45      | 30-F11      | FITC             | BLUE   |
|                | CD103     | 2-E7        | PerCP-eFluor 710 | BLUE   |
|                | CD11c     | N418        | PE-Cy7           | YG     |
|                | CD64      | X54-5/7.1   | PE               | YG     |
|                | CD24      | M1/69       | PE-CF594         | YG     |
|                | Siglec F  | 1RNM44N     | eFLUOR 660       | RED    |
|                | Ly6G      | 1A8         | Alexa fluor 700  | RED    |
|                | Ly6C      | AL-21       | APC-Cy7          | RED    |
|                | CD11b     | M1/70       | eFLUOR 450       | VIOLET |
|                | MHCII     | M5/114.15.2 | Horizon v500     | VIOLET |
|                | CD3       | 17A2        | BV650            | VIOLET |
|                | CD19      | 6D5         | BV650            | VIOLET |
|                | NK1.1     | PK136       | BV650            | VIOLET |
|                | Live/dead |             | Zombie UV        | UV     |
| Lymphoid cells | CD3       | 145-2C11    | FITC             | BLUE   |
|                | CD8       | 53-6.7      | PerCP-Cy5.5      | BLUE   |
|                | NK1.1     | PK136       | Pe-Cy7           | YG     |
|                | CXCR3     | CXCR3-173   | PE               | YG     |
|                | CD4       | RM4-5       | APC e780         | RED    |
|                | DX5       | DX5         | APC              | RED    |
|                | B220      | RA3-6B2     | BV786            | VIOL   |
|                | CD45      | 30-F11      | BUV395           | UV     |
|                | Live/dead |             | Zombie Aqua      | VIOL   |

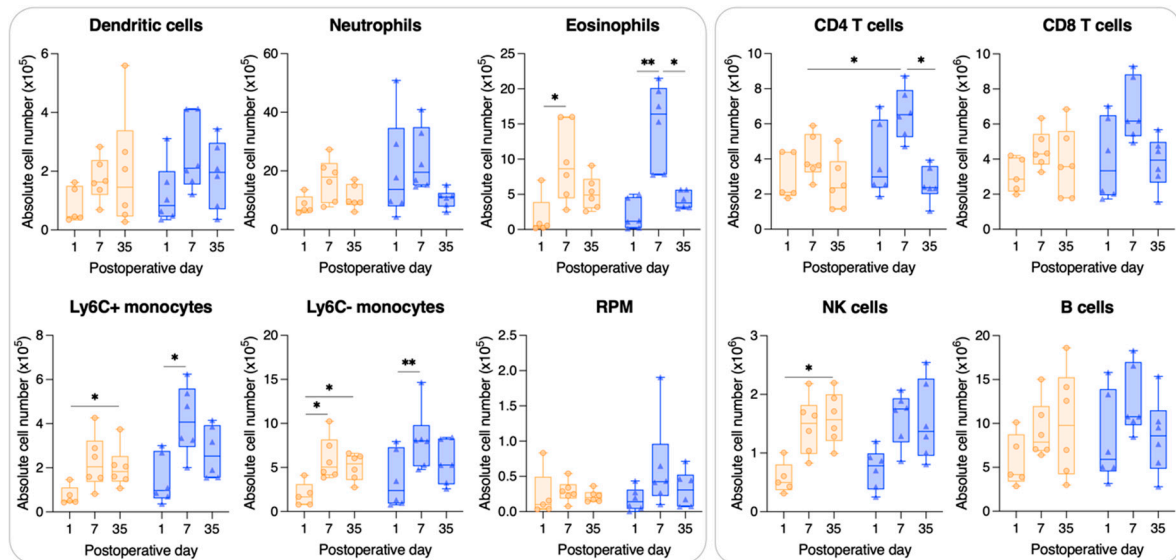

**Figure S4: Myeloid and lymphoid splenic cells after murine lung transplantation.** Isograft, depicted in orange, (C57BL/6 → C57BL/6) and allograft, depicted in blue, (BALB/c → C57BL/6) combinations were used at indicated days after transplantation. Left panel shows the absolute numbers of splenic, myeloid immune cells including dendritic cells (CD45+ MHCII+ CD11c+); neutrophils (CD45+ CD11b+ Ly6G+); eosinophils (CD45+ SiglecF+ CD11c-); Ly6C+ monocytes (CD45+ CD11b+ MHCII- Ly6C+); Ly6C- monocytes (CD45+ CD11b+ MHCII- Ly6C-); RPM (CD45+ MHCII- SiglecF- F4/80+ CD11b-). Right panel includes the absolute numbers of splenic, lymphoid immune cells including: CD4+ T cells (CD45+ CD3+ NK1.1- CD4+); CD8+ T cells (CD45+ CD3+ NK1.1- CD8+); NK cells (CD45+ CD3- NK1.1+ DX5+); B cells (CD45+ CD3- NK1.1- B220+). Data are shown as box-and-whisker plots (box: median with interquartile range, whiskers: full data distribution), with each data point representing an individual mouse sample. \*  $p \leq 0.05$ ; \*\*  $p \leq 0.01$ . RPM = red pulp macrophages.
